# Supplementary material for: Identification of Key Prognostic Biomarker and Its Correlation with Immune Infiltrates in Pancreatic Ductal Adenocarcinoma
Source: Dis Markers. 2020 Aug 31;2020:8825997. doi: 10.1155/2020/8825997 (PMC7479484; doi:10.1155/2020/8825997)
Supplement: Supplementary 2 — Supplementary Table 1: relationship between 10 hub gene expression and immune infiltration level in PDAC. [file 8825997.f2.xlsx]

## Sheet: 10 gene TEMIER p VALUE
Relationship Between 10 hub gnens Expression and Immune Infiltration Level in PDAC
Gene	variable	Purity	B Cell	CD8+ T Cell	CD4+ T Cell	Macrophage	Neutrophil	Dendritic Cell
BGN	partial.cor	-0.224064	0.104554	0.275106	0.387172	0.610695	0.563698	0.48355
	p	0.00312866	0.173537	0.000270936	1.99131e-07	7.40406e-19	9.97591e-16	2.0935e-11
COL5A2	partial.cor	-0.189916	0.243909	0.447471	0.130572	0.65519	0.596157	0.608097
	p	0.0125847	0.00130525	8.46275e-10	0.090629	2.43137e-22	7.80489e-18	1.13801e-18
COL6A3	partial.cor	-0.158554	0.24139	0.441724	0.222309	0.670724	0.576832	0.612915
	p	0.0377631	0.00146973	1.46746e-09	0.00367241	1.06427e-23	1.49473e-16	5.11237e-19
COL11A1	partial.cor	-0.173149	0.0806201	0.249923	-0.0226623	0.409607	0.446411	0.382152
	p	0.0231193	0.294537	0.000978374	0.769934	2.65103e-08	9.37466e-10	2.49929e-07
COL12A1	partial.cor	-0.158077	0.182834	0.385841	0.0645385	0.53724	0.508531	0.525712
	p	0.0383515	0.0166868	1.87063e-07	0.404482	3.57568e-14	1.23966e-12	1.54592e-13
FBN1	partial.cor	-0.221532	0.357911	0.598376	0.166602	0.765564	0.642957	0.688909
	p	0.00349413	1.53868e-06	5.49008e-18	0.0303948	3.39035e-34	2.51752e-21	2.12887e-25
POSTN	partial.cor	-0.177972	0.0967774	0.249446	0.113737	0.46871	0.482561	0.497708
	p	0.0195047	0.207957	0.00100124	0.140917	1.0104e-10	2.33067e-11	4.33873e-12
SPARC	partial.cor	-0.222581	0.27634	0.481352	0.197607	0.700376	0.584182	0.629297
	p	0.0033382	0.000253584	2.65585e-11	0.0100162	1.55325e-26	4.97613e-17	3.03007e-20
THBS2	partial.cor	-0.198664	0.226428	0.441296	0.049872	0.615645	0.587214	0.58339
	p	0.00898707	0.00290145	1.52822e-09	0.519624	3.2292e-19	3.13546e-17	5.60984e-17
VCAN	partial.cor	-0.263413	0.269081	0.495654	0.143596	0.689925	0.636678	0.646683
	p	0.000480677	0.000372622	5.47625e-12	0.0625244	1.69627e-25	8.0235e-21	1.24931e-21
